# Supplementary material for: Synthesis and photovoltaic properties of three different types of terpolymers
Source: Royal Society of Chemistry journal article supplement (doi:10.1039/c6qm00267f), 2017-01-01
Supplement: c6qm00267f1.pdf [file c6qm00267f1.pdf]

*Supplementary Information*

**Synthesis and photovoltaic properties of three different types of terpolymers**

Mohammad Afsar Uddin,<sup>a,b†</sup> Na Gyeong An,<sup>c†</sup> Yuxiang Li,<sup>a,b</sup> Seyeong Song,<sup>c</sup> Hwasook Ryu,<sup>a</sup>  
Jin Young Kim,<sup>c\*</sup> and Han Young Woo<sup>a\*</sup>

<sup>a</sup> Department of Chemistry, Korea University, Seoul 136-701, Republic of Korea

<sup>b</sup> Department of Cogno-Mechatronics Engineering, Pusan National University, Miryang 627-706, Republic of Korea

<sup>c</sup> Department of Energy Engineering, School of Energy and Chemical Engineering, Ulsan National Institute of Science and Technology (UNIST), Ulsan 689-798, South Korea.

<sup>†</sup> These authors contributed equally.

\*E-mail: J. Y. Kim ([jykim@unist.ac.kr](mailto:jykim@unist.ac.kr)); H. Y. Woo ([hywoo@korea.ac.kr](mailto:hywoo@korea.ac.kr))

## Synthesis

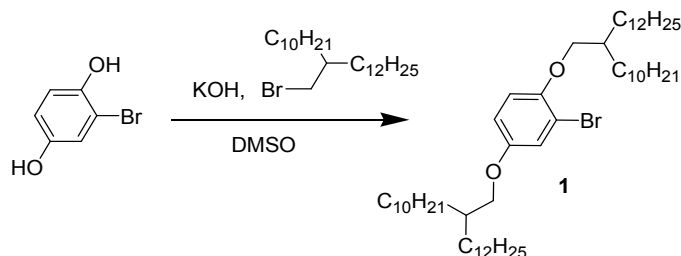

**1-Bromo-2,5-bis(2-decyltetradecyloxy)benzene (1).** Into a suspension of KOH solution (2.5 g, 0.044 mol) in dimethylsulfoxide (DMSO, 50 mL), 2-bromohydroquinone (2.1 g, 0.011 mol) and 1-bromo-2-decyltetradecane (18.4 g, 0.044 mol) were added and the reaction mixture was stirred at 60 °C for 10 h. The reaction solution was cooled down to room temperature and poured into ice water and the mixture was extracted with chloroform. The solvent was removed under reduced pressure and the crude compound was purified by silica gel column chromatography, using hexane as the eluent to yield compound 1 (44% yield) of a colorless oil. <sup>1</sup>H NMR (300 MHz, CDCl<sub>3</sub>): δ (ppm) 7.10 (s, 1H), 6.78 (dd, 2H), 3.82 (d, 2H), 3.75 (d, 2H), 1.78 (m, 2H), 1.78 (m, 1H), 1.73 (m, 1H), 1.49-1.20 (br, 80H), 0.88 (m, 12H). <sup>13</sup>C NMR (75 MHz, CDCl<sub>3</sub>): δ (ppm) 153.7, 149.9, 119.5, 114.2, 112.7, 72.8, 71.6, 38.0, 32.0, 31.3, 30.0, 29.7, 29.4, 26.9, 22.7, 14.1.

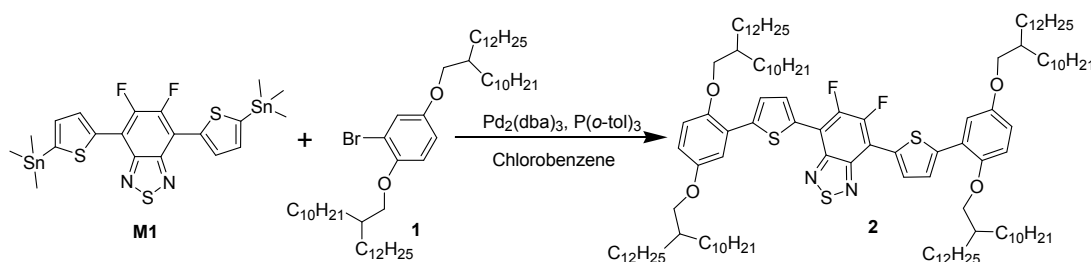

**4,7-Bis(5-(2,5-bis(2-decyltetradecyloxy)phenylene)-2-thienyl)-5,6-difluoro-2,1,3-benzothiadiazole (2).** 4,7-Bis(5-trimethylstannylthiophen-2-yl)-5,6-difluoro-2,1,3-benzothiadiazole (M1) (1.0 g, 1.50 mmol), 1-bromo-2,5-bis(2-decyltetradecyloxy)benzene (1) (3.2 g, 3.75 mmol), tris(dibenzylideneacetone)dipalladium(0) (4 mol%) and tri(o-tolyl)phosphine (8 mol%) were added in a 30 mL microwave vial. The vial was sealed and purged with nitrogen. Chlorobenzene (10 mL) was added to the vial and the reaction mixture was heated at 80 °C for 10 min and at 140 °C for 60 min in

a microwave reactor. After the reaction was completed, the solvent was removed under reduced pressure and the compound 2 was purified by column chromatography (eluent: hexane/CHCl<sub>3</sub> = 4/1, v/v). Yield: 90%. <sup>1</sup>H NMR (300 MHz, CDCl<sub>3</sub>): δ (ppm) 8.30 (d, 2H), 7.65 (d, 2H), 7.33 (d, 2H), 6.92 (d, 2H), 6.92 (dd, 2H), 3.96 (d, 4H), 3.86 (d, 4H), 1.92 (m, 2H), 1.78 (m, 2H), 1.61 (m, 4H), 1.40 (m, 8H), 1.36-1.10 (br, 68H), 0.84 (m, 12H). <sup>13</sup>C NMR (75 MHz, CDCl<sub>3</sub>): δ (ppm) 150.7, 149.2, 148.2, 137.4, 133.4, 131.4, 120.6, 117.7, 116.4, 113.4, 110.6, 72.6, 72.2, 37.7, 31.7, 31.2, 31.1, 29.8, 29.5, 29.4, 29.1, 26.6, 22.4, 13.9.

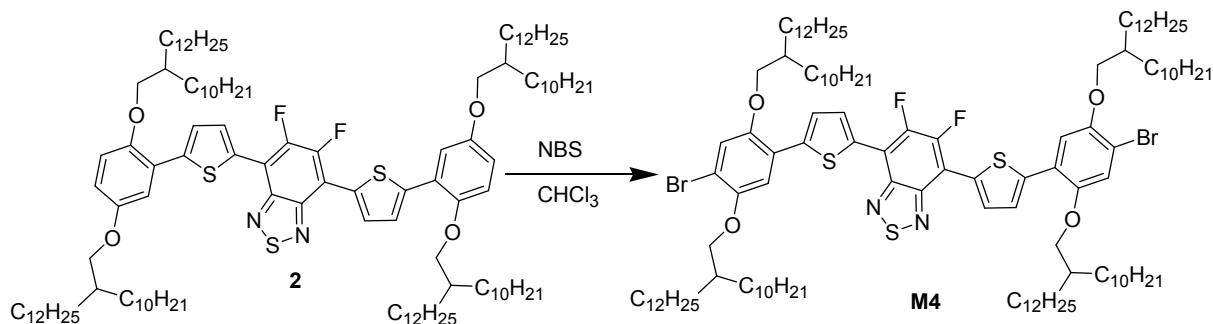

#### 4,7-Bis(5-(4-bromo-2,5-bis(2-decyltetradecyloxy)phenylene)-2-thienyl)-5,6-difluoro-2,1,3-

**benzothiadiazole (M4).** Compound 2 (1 g, 0.5 mmol) was dissolved in 25 mL of CH<sub>3</sub>CN in a 50 mL flask under N<sub>2</sub> atmosphere. 0.1 g (1.2 mmol, 2.2 equiv.) of *N*-bromosuccinimide (NBS) was added portionwise and stirred for 24 h. Excess solvent was distilled out. The crude product was purified by column chromatography (eluent: hexane/CHCl<sub>3</sub> = 5/1, v/v). Yield: 65%. <sup>1</sup>H NMR (300 MHz, CDCl<sub>3</sub>): δ (ppm) 8.30 (d, 2H), 7.65 (d, 2H), 7.19 (s, 2H), 7.12 (s, 2H), 3.89 (d, 4H), 3.82 (d, 4H), 1.82 (m, 2H), 1.71 (m, 2H), 1.49 (m, 4H), 1.36 (m, 8H), 1.26-1.10 (br, 68H), 0.86 (m, 12H). <sup>13</sup>C NMR (75 MHz, CDCl<sub>3</sub>): δ (ppm) 153.3, 149.9, 125.6, 123.5, 114.6, 114.4, 113.4, 72.2, 71.7, 38.3, 38.1, 31.9, 31.5, 31.4, 30.1, 29.7, 29.4, 27.0, 26.9, 22.7, 14.1.

#### General Procedure of polymerization.

In a N<sub>2</sub> filled glovebox, corresponding monomers (1:1 mole ratio), tris(dibenzylideneacetone)dipalladium(0) (3 mol%), and tri(*o*-tolyl)phosphine (8 mol%) were added in a 5 mL microwave vial. The vial was sealed, and chlorobenzene was added as a solvent. The polymerization reaction was carried out in a microwave reactor: 10 min at 80 °C, 10 min at 100 °C, 40 min at 140 °C. The polymer was end-capped by addition of 0.1 equiv of 2-

(tributylstannyl)thiophene and reacted further at 140 °C for 20 min. The polymer solution was cooled, 0.2 equiv of 2-bromothiophene was added by syringe, and the reaction solution was further reacted at 140 °C for 20 min. The crude polymer was precipitated into a mixture of methanol:HCl (350 mL:10 mL) and purified by Soxhlet extraction with acetone, hexane, and chloroform. The dissolved portion in CHCl<sub>3</sub> was concentrated under reduced pressure and precipitated into cold methanol. The polymer was dried under vacuum for 24 h.

**Poly[(2,5-bis(2-decyltetradecyloxy)phenylene)-*alt*-(5,6-difluoro-4,7-di(thiophen-2-yl)benzo[c][1,2,5]thiadiazole)] (PPDT2FBT<sub>DT</sub>).** 4,7-Bis(5-trimethylstannylthiophen-2-yl)-5,6-difluoro-2,1,3-benzothiadiazole (M1) and 1,4-dibromo-2,5-bis(2-decyltetradecyloxy)benzene (M3) (1:1 mole ratio) was reacted by following the above polymerization procedure. Yield: 65%. Number-average molecular weight (GPC, *o*-dichlorobenzene):  $M_n = 31,000$  g/mol (PDI = 2.0)

**Poly[(2,5-bis(2-decyltetradecyloxy)phenylene)-*alt*-(5,6-dicyano-4,7-di(thiophen-2-yl)benzo[c][1,2,5]thiadiazole)] (PPDT2CNBT).** 4,7-bis(5-trimethylstannylthiophen-2-yl)-5,6-dicyano-2,1,3-benzothiadiazole (M2) and 1,4-dibromo-2,5-bis(2-decyltetradecyloxy)benzene (M3) (1:1 mole ratio) were reacted. Yield: 67%.  $M_n = 28,000$  g/mol (PDI = 2.2).

**PPDT2FBT<sub>DT</sub>-*random*-PPDT2CNBT.** M1:M2:M3 (0.5:0.5:1 mole ratio). Yield: 71%.  $M_n = 30,000$  g/mol (PDI = 2.6).

**PPDT2FBT<sub>DT</sub>-*regular*-PPDT2CNBT.** M2:M4 (1:1 mole ratio). Yield: 73%.  $M_n = 34,000$  g/mol (PDI = 2.3).

**PPDT2FBT<sub>DT</sub>-Br.** Polymerization was done similarly as for PPDT2FBT<sub>DT</sub> and end-capped by addition of 1 equiv. of 2-(tributylstannyl)thiophene.  $M_n = 20,000$  g/mol (PDI = 2.2)

**PPDT2FBT<sub>DT</sub>-*block*-PPDT2CNBT.** M2 and M3 (1:1 mole ratio) were reacted with PPDT2FBT<sub>DT</sub>-Br by following a similar procedure for PPDT2FBT<sub>DT</sub>. Yield: 69%. Number-average molecular weight:  $M_n = 28,000$  g/mol (PDI = 2.6).

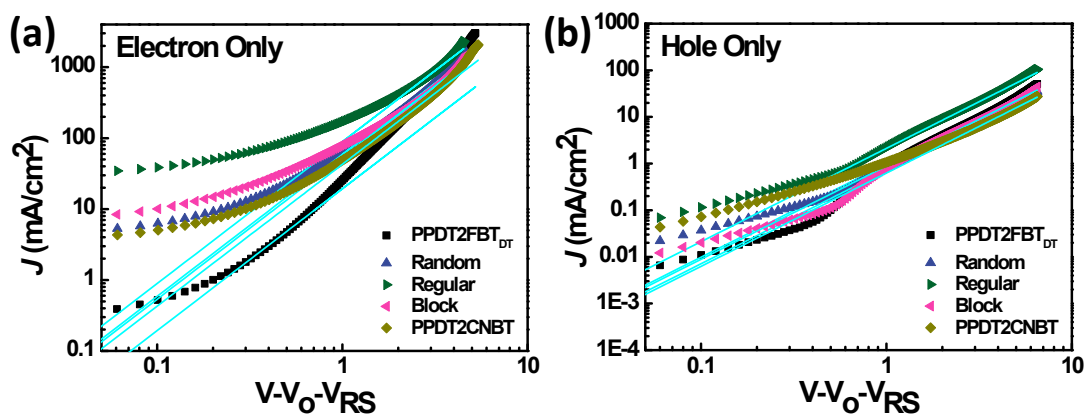

**Fig. S1.**  $J$ - $V$  characteristics of (a) electron-only and (b) hole-only devices. Sky blue lines represent fits of the curves using the Mott-Gurney relationship.

**Table S1.** Summary of electron and hole mobilities for five BHJ PSCs.

| Polymer                | Thickness [nm] | Electron mobility [ $\text{cm}^2 \text{V s}^{-1}$ ] | Thickness [nm] | Hole mobility [ $\text{cm}^2 \text{V s}^{-1}$ ] | $\mu_e/\mu_{\text{hole}}$ |
|------------------------|----------------|-----------------------------------------------------|----------------|-------------------------------------------------|---------------------------|
| PPDT2FBT <sub>DT</sub> | 260            | $1.10 \times 10^{-3}$                               | 320            | $1.06 \times 10^{-4}$                           | 10.4                      |
| Random                 | 230            | $2.37 \times 10^{-3}$                               | 330            | $8.41 \times 10^{-5}$                           | 28.2                      |
| Regular                | 200            | $2.32 \times 10^{-3}$                               | 250            | $1.15 \times 10^{-4}$                           | 20.2                      |
| Block                  | 170            | $8.67 \times 10^{-4}$                               | 250            | $4.70 \times 10^{-5}$                           | 18.5                      |
| PPDT2CNBT              | 200            | $1.20 \times 10^{-3}$                               | 260            | $3.56 \times 10^{-5}$                           | 33.7                      |

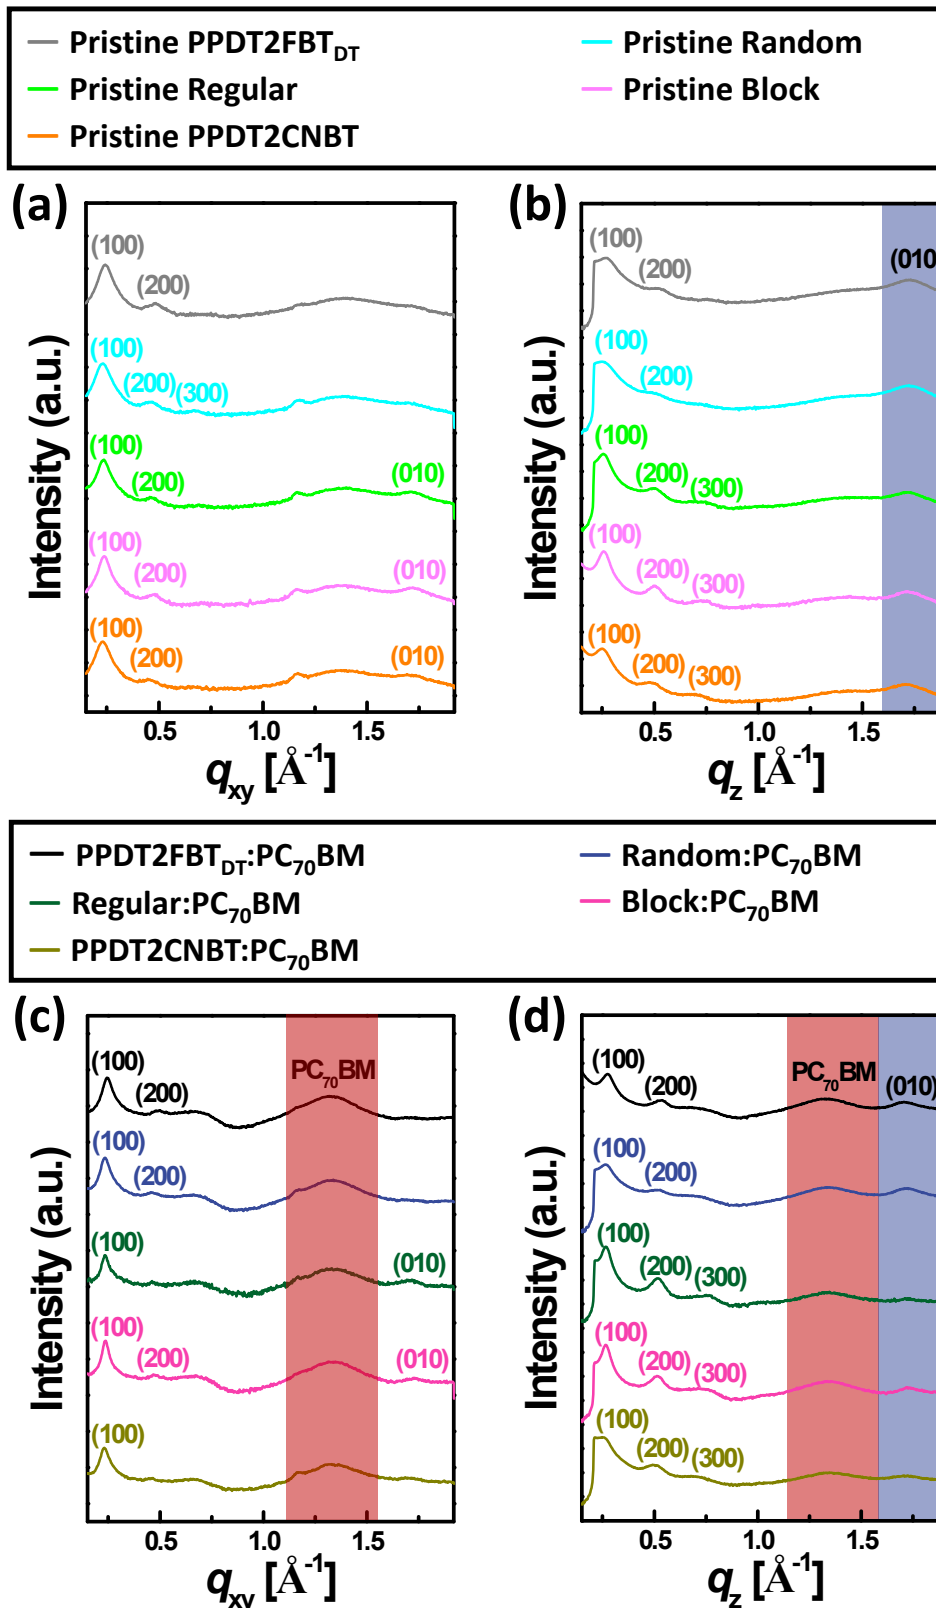

**Fig. S2.** Scattering line-cuts along (a and c) in-plane and (b and d) out-of-plane direction for (a-b) pristine polymers and (c-d) polymer:PC<sub>70</sub>BM blend films.

**Table S2.** Summary of GIWAXS packing parameters.

| Type                                         | Direction               | Scattering vector (q) of $\pi$ - $\pi$ stacking [ $\text{\AA}^{-1}$ ] | d-spacing [ $\text{\AA}$ ] | Scattering vector (q) of lamella peak [ $\text{\AA}^{-1}$ ] | d-spacing [ $\text{\AA}$ ] |
|----------------------------------------------|-------------------------|-----------------------------------------------------------------------|----------------------------|-------------------------------------------------------------|----------------------------|
| Pristine PPD2T2FBT <sub>DT</sub>             | In-plane ( $q_{xy}$ )   | -                                                                     | -                          | 0.245                                                       | 25.664                     |
|                                              | Out-of- plane ( $q_z$ ) | 1.721                                                                 | 3.652                      | 0.270                                                       | 23.305                     |
| Pristine Random                              | In-plane ( $q_{xy}$ )   | -                                                                     | -                          | 0.232                                                       | 27.080                     |
|                                              | Out-of- plane ( $q_z$ ) | 1.722                                                                 | 3.648                      | 0.250                                                       | 25.140                     |
| Pristine Regular                             | In-plane ( $q_{xy}$ )   | 1.715                                                                 | 3.664                      | 0.236                                                       | 26.628                     |
|                                              | Out-of- plane ( $q_z$ ) | 1.705                                                                 | 3.685                      | 0.258                                                       | 24.373                     |
| Pristine Block                               | In-plane ( $q_{xy}$ )   | 1.720                                                                 | 3.652                      | 0.290                                                       | 26.300                     |
|                                              | Out-of- plane ( $q_z$ ) | 1.721                                                                 | 3.652                      | 0.257                                                       | 24.488                     |
| Pristine PPD2T2CNBT                          | In-plane ( $q_{xy}$ )   | 1.696                                                                 | 3.706                      | 0.231                                                       | 27.198                     |
|                                              | Out-of- plane ( $q_z$ ) | 1.712                                                                 | 3.670                      | 0.253                                                       | 24.870                     |
| PPD2T2FBT <sub>DT</sub> :PC <sub>70</sub> BM | In-plane ( $q_{xy}$ )   | -                                                                     | -                          | 0.247                                                       | 25.459                     |
|                                              | Out-of- plane ( $q_z$ ) | 1.707                                                                 | 3.681                      | 0.274                                                       | 22.906                     |
| Random :PC <sub>70</sub> BM                  | In-plane ( $q_{xy}$ )   | -                                                                     | -                          | 0.234                                                       | 26.852                     |
|                                              | Out-of- plane ( $q_z$ ) | 1.722                                                                 | 3.648                      | 0.266                                                       | 23.651                     |
| Regular :PC <sub>70</sub> BM                 | In-plane ( $q_{xy}$ )   | 1.717                                                                 | 3.660                      | 0.234                                                       | 26.852                     |
|                                              | Out-of- plane ( $q_z$ ) | 1.738                                                                 | 3.616                      | 0.266                                                       | 23.651                     |
| Block :PC <sub>70</sub> BM                   | In-plane ( $q_{xy}$ )   | 1.731                                                                 | 3.630                      | 0.236                                                       | 26.628                     |
|                                              | Out-of- plane ( $q_z$ ) | 1.721                                                                 | 3.652                      | 0.266                                                       | 23.651                     |
| PPD2T2CNBT :PC <sub>70</sub> BM              | In-plane ( $q_{xy}$ )   | 1.697                                                                 | 3.702                      | 0.232                                                       | 27.080                     |
|                                              | Out-of- plane ( $q_z$ ) | 1.704                                                                 | 3.688                      | 0.248                                                       | 25.340                     |
